# Supplementary material
Source: MDPI journal article supplement (https://www.mdpi.com/2571-6980/1/2/22)
Supplement: s1 [file s1]

Article

# Effects of Chemically-Functionalized Single-Walled Carbon Nanotubes on the Morphology and Vitality of D54MG Human Glioblastoma Cells

Seantel Hopkins, Manoj K. Gottipati, Vedrana Montana, Elena Bekyarova,  
Robert C. Haddon, Vladimir Parpura

This file includes:

Methods and Materials

Supplementary Figure S1

References

## Materials and Methods

Here we only provide an essential summary of the methods used in the generation of Supplementary Figure S1.

**Purified astrocytic cultures.** Astrocytes isolated from the visual cortices of 0-2-day-old C57BL/6 (wild-type) mice were purified and maintained in cell culture as we previously described [1,2]. Experiments were conducted on purified astrocytes grown on polyethyleneimine (PEI)-coated glass coverslips. Experimental protocols were approved by Institutional Animal Care and Use Committee at the University of Alabama at Birmingham.

**Glial fibrillary acidic protein immunocytochemistry.** Astrocytes and D54MG glioma cells grown on PEI-coated and uncoated glass coverslips, respectively, were fixed with freshly prepared Dent's fixative (80% methanol and 20% dimethyl sulfoxide) and labeled for glial fibrillary acidic protein (GFAP) using a primary mouse monoclonal antibody (1:500 dilution; ICN Cat. No. 69110; MP Biomedicals; Solon, OH) followed by a tetramethylrhodamine isothiocyanate (TRITC)-conjugated secondary antibody [2]. After completion of the labeling procedure, the cells were analyzed for the density of GFAP immunoreactivity based on the images acquired using a standard TRITC filter set and a 60× Plan Apo objective [1]. The cell area was established by manual tracing of the differential interference contrast (DIC) images [1].

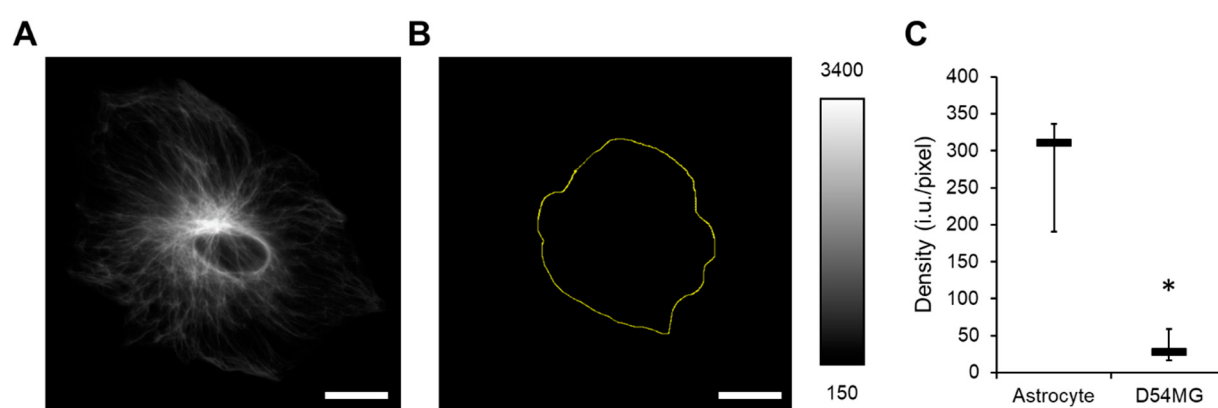

**Supplementary Figure S1.** Glial fibrillary acidic protein (GFAP) expression in primary mouse astrocytes and lack thereof in D54MG human glioma cells. A) GFAP immunoreactivity (ir) of a solitary astrocyte. B) Lack of GFAP expression in solitary D54MG human glioma cell, whose perimeter is traced in yellow based on the corresponding DIC image. Gray scale is a linear representation of the fluorescence intensities, expressed in fluorescence intensity units (i.u.), of the pixels in the images. Scale bars, 20  $\mu$ m. C) Summary graph comparing the density of GFAP-ir, in astrocytes and D54MG human glioma cells (n=5 in each group). The boxes represent medians with interquartile ranges. Asterisk indicates a significant difference determined by Mann-Whitney U-test. \*:  $p < 0.05$ .
